1 **Non-coding AUG circRNAs constitute an abundant and conserved subclass of circles.**

2

3 Lotte VW Stagsted<sup>1</sup>, Katrine M Nielsen<sup>1</sup>, Iben Daugaard<sup>1</sup>, and Thomas B Hansen<sup>1\*</sup>

4

5 1. Department of Molecular Biology and Genetics (MBG), and Interdisciplinary Nanoscience Center  
6 (iNANO), Aarhus University, Aarhus, Denmark

7

8 \* To whom correspondence should be addressed:

9 T.B.H.: [tbh@mbg.au.dk](mailto:tbh@mbg.au.dk);

10

11

12 Running title: AUG circRNAs

13 Keywords: circRNA, circRNA translation, circRNA biogenesis, non-coding RNA, dhx9, ribosome  
14 profiling, riboseq

15

## 16 **Abstract**

17 Circular RNAs (circRNAs) are a subset of noncoding RNAs (ncRNAs) previously considered as  
18 products of missplicing. Now, circRNAs are considered functional molecules, although to date, only  
19 few functions have been experimentally validated, and therefore the vast majority of circRNAs are  
20 without known relevance. Here, based on RNA sequencing from the ENCODE consortium, we  
21 identify and characterize a subset of circRNAs, coined AUG circRNAs, defined by spanning the  
22 canonical translational start site in the protein-coding host genes. AUG circRNAs are more  
23 abundantly expressed and conserved than other groups of circRNAs, and they display an *Alu*-  
24 independent mechanism of biogenesis. The AUG circRNAs contain part of bona fide ORF, and in the  
25 recent years, several studies have reported cases of circRNA translation. However, using thorough  
26 cross-species analysis, extensive ribosome profiling analyses and experimental data on a selected  
27 panel of AUG circRNAs, we observe no indications of translation of AUG circRNAs or any other  
28 circRNAs. Our data provide a comprehensive classification of circRNAs and, collectively, the analyses  
29 suggest that the AUG circRNAs constitute an abundant subclass of circRNAs produced  
30 independently of primate-specific *Alu* elements. Moreover, AUG circRNAs exhibit high cross-species  
31 conservation and are therefore likely to be functionally relevant.

32

## 33 **Introduction**

34 Non-coding RNAs (ncRNAs) constitute the vast majority of the human transcriptome as only a few  
35 percent of the produced transcripts are translated into proteins (ENCODE Project Consortium 2012).  
36 NcRNAs represent a highly heterogeneous group of molecules that besides including essential  
37 elements of protein synthesis, ribosomal RNA (rRNA) and transfer RNA (tRNA), also comprise small  
38 RNAs, such as microRNAs (miRNAs), which are involved in regulation of mRNA stability and protein  
39 synthesis (Bartel 2009), as well as long noncoding RNAs (lncRNAs) that typically regulate chromatin  
40 states in the nucleus (Böhmdorfer and Wierzbicki 2015). Recently, by means of high throughput  
41 tools, circular RNAs (circRNAs) were added to the rapidly expanding list of non-coding RNAs  
42 (Ebbesen et al. 2016). CircRNAs are typically derived from annotated protein-coding genes, but due  
43 to their relatively low abundance compared to their linear messenger RNA (mRNA) counterparts,  
44 circRNA molecules were first presumed to be missplicing events of the spliceosome with little to no  
45 relevance (Cocquerelle et al. 1993; Zaphiropoulos 1997). While this may be the case for a substantial

46 subset of circRNAs, the identification and functional characterization of the highly conserved  
47 circRNA and miR-7-sponge, CDR1as/ciRS-7 (Hansen et al. 2013b; Memczak et al. 2013), as well as  
48 extensive profiling of differentially expressed circRNAs from RNA sequencing analyses (Rybak-Wolf  
49 et al. 2015; Memczak et al. 2013; Salzman et al. 2012; Veno et al. 2015) strongly supports circRNAs  
50 as biologically relevant RNA species in eukaryotic cells. CircRNAs are generated by non-linear splicing  
51 (coined backsplicing) where an upstream splice acceptor (SA) is covalently joined to a downstream  
52 splice donor (SD) resulting in a circular structure (Hansen et al. 2011; Jeck et al. 2013). This results  
53 in a very high intracellular stability due to the lack of free ends, which protects them from normal  
54 exonucleolytic decay. CircRNAs are mostly comprised of exonic regions (most commonly 2-3 exons)  
55 derived from annotated protein-coding transcripts (Zhang et al. 2014). The current model of  
56 biogenesis suggests that backsplicing is stimulated by bringing the involved splice sites into close  
57 proximity (Ebbesen et al. 2016). This is conventionally facilitated by inverted *Alu* elements (IAE) (Jeck  
58 et al. 2013; Zhang et al. 2014), however trans-acting RNA-binding factors have also been implicated  
59 in circRNA formation (Ashwal-Fluss et al. 2014; Conn et al. 2015; Li et al. 2017).

60 With the exception of the exon-intron circRNAs (EliciRNA) (Li et al. 2015), circRNAs are exported to  
61 the cytoplasm (Jeck et al. 2013) by a yet unknown mechanism. In the cytoplasm, circRNAs have been  
62 shown to tether and 'sponge' miRNAs, initially exemplified by CDR1as/ciRS-7 harbouring >70 miR-7  
63 binding sites (Hansen et al. 2013a; Memczak et al. 2013). Since then, several other examples have  
64 been published showing anti-miR effects of circRNA expression (Peng et al. 2016; Chaiteerakij et al.  
65 2017; Zheng et al. 2016), although, bioinformatics analysis indicates that - apart from ciRS-7 - miRNA  
66 binding sites are generally not enriched in circRNA more than expected by chance (Guo et al. 2014).  
67 CircRNAs can also sequester RNA binding proteins and hereby modulate protein activity (Ashwal-  
68 Fluss et al. 2014). Additionally, synthetic circRNAs have been engineered to express protein by the  
69 use of internal ribosome entry sites (IRESs) allowing cap-independent translation (Wang and Wang  
70 2015). Recently, it was shown that open reading frames (ORFs) within endogenously expressed  
71 circRNAs give rise to circRNA-specific peptides (Legnini et al. 2017; Pamudurti et al. 2017; Yang et  
72 al. 2017) suggesting that circRNAs are not necessarily exclusively noncoding.

73 In this study, publicly available RNA sequencing datasets from the ENCODE consortium are used to  
74 characterize the circRNA transcriptomes in 378 human and 75 murine samples, and the most  
75 abundant circRNAs in each dataset are identified, analyzed and stratified based on their genomic

76 features. These analyses reveal that a substantial fraction of highly abundant circRNAs derives from  
77 exons encoding the translational start codon, here coined AUG circRNAs. In addition, the AUG  
78 circRNAs are more conserved than other groups of circRNAs and generally rely on an IAE-  
79 independent mode of biogenesis. Lastly, to determine the protein-codon ability of AUG circRNAs,  
80 we conduct extensive analyses of cross-species conservation and ribosome profiling (RiboSeq). This  
81 shows that ORF-associating features are not preserved in evolution and that backsplice-spanning  
82 reads found in RiboSeq datasets are not derived from translating ribosomes. Consistently, we fail to  
83 detect any peptides derived from AUG circRNAs using ectopic overexpression in cell-lines.  
84 Collectively, these results suggest that circRNAs are generally not subjected to translation and thus  
85 the functional relevance of the most conserved and abundant AUG circRNAs remains elusive.

86

## 87 **Results**

### 88 *The ENCODE circRNA landscape*

89 To obtain a comprehensive overview of circRNA expression across multiple tissues and cell lines, we  
90 took advantage of the total RNA sequencing datasets on human and mouse samples made available  
91 from the ENCODE consortium (see Supplementary Table 1). We conducted circRNA prediction and  
92 quantification using two established pipelines; find\_circ (Memczak et al. 2013) and circexplorer2  
93 (Zhang et al. 2016). In total, find\_circ and circexplorer2 identify 140,304 and 235,179 unique  
94 circRNAs using slightly modified settings (see methods), respectively, of which 81,589 are shared by  
95 both algorithms (**Fig. 1A**). The notable fraction of circRNAs only predicted by one algorithm – the  
96 so-called exotic circRNAs – is in general lowly expressed (**Fig. 1B**), which is also reflected by a small  
97 subset of exotic circRNAs in the top 1000 expressed circRNA candidates predicted by each algorithm  
98 (1-8%, data not shown). Consistently, we observe a high positive correlation between the algorithms  
99 for the abundant circRNA species (**Fig. 1C**, similar analyses for mouse samples are shown in  
100 **Supplementary Figs. 1A-C**). We have previously shown that exotic circRNAs are more likely to be  
101 false positives (Hansen et al. 2015), and therefore we decided to focus only on the circRNAs jointly  
102 predicted by both algorithms.

103 The used ENCODE data comprises 378 samples derived from 218 different human tissues and cell  
104 lines (or 75 samples from 26 tissues in mouse, **Supplementary Table 1**). Plotting the expression of  
105 circRNAs in each sample reveal a marked difference in circRNA expression between tissues  
106 (**Supplementary Figs. 2A and C**), although this is also observed for mRNAs (**Supplementary Figs. 2B**  
107 and **D**). Moreover, even though the detected diversity of circRNAs is much lower in mouse, the  
108 overall expression levels are comparable (**Supplementary Fig. 3A**). CircRNA levels have previously  
109 been correlated with proliferation, i.e. circRNAs tend to accumulate in slow or non-proliferative  
110 tissue (Bachmayr-Heyda et al. 2015). Thus, circRNA profiling from non-dividing cells may dominate  
111 the average expression levels of circRNA across samples. Instead of comparing expression across  
112 samples, we instead focused on the highest expressed circRNA in each sample (the alpha circRNA).  
113 Here, the alpha circRNA in many samples exhibits disproportionally high expression compared to  
114 the bulk of circRNAs. In fact, assuming a log-normal distribution of circRNA expression, the alpha  
115 circRNAs are significant outliers in more than half of the samples (246 out of 378,  $fdr < 0.05$ , one-  
116 tailed Grubbs test), whereas only 9 of 378 samples show similar significant outlier mRNAs. This  
117 tendency is also observed in mouse (**Supplementary Fig. 3B**).

118 Based on the ENCODE data, circHIPK3 is the most predominant alpha circRNA followed by the miR-  
119 7 sponge, ciRS-7 (**Fig. 1D**). Even though most of the top 10 alpha circRNAs are found in the mouse  
120 dataset, only circSLC8A1 and circCDYL are shared in the top 10 between mouse and human (**Fig. 1D**  
121 and **Supplementary Fig. 4A**).

122 We then zoomed in on the top10 alpha circRNAs, i.e. the ten circRNAs most often seen as the highest  
123 expressed in a given sample, to determine the genomic features associating with these highly  
124 abundant circRNA species (see **Fig. 1E**). Here, the human alpha circRNAs are flanked with very distal  
125 inverted *Alu* elements (IAE), which is in stark contrast to the bulk of circRNAs (**Fig. 1F**) and the  
126 prevalent model of biogenesis (Jeck et al. 2013; Zhang et al. 2014). Moreover, no significant  
127 association between circRNA producing loci and other inverted repeat elements are observed for  
128 the alpha circRNAs specifically or circRNAs in general compared to host gene exons (**Fig. 1F**). In  
129 mouse, no repetitive elements are selectively demarcating circRNAs from host exons  
130 (**Supplementary Fig. 4B**), although a slight tendency towards proximal B1/*Alu* SINE elements was  
131 detected. Instead, for both species, we observe a clear tendency for alpha circRNAs to have very

132 long flanking introns (**Fig. 1F** and **Supplementary Fig. 4B**). Moreover, a positive correlation between  
133 intron length and IAE distance is detected (**Fig. 1G** and **Supplementary Fig. 4C**), indicating that  
134 circRNAs either utilize an *Alu*-dependent mechanism of biogenesis or require long flanking introns  
135 to favour back-splicing.

136

### 137 *AUG circRNAs are highly expressed and conserved*

138 The vast majority of circRNAs derive from annotated splice-sites (Zhang et al. 2016), and we decided  
139 to stratify circRNAs by host-gene annotation (see **Fig. 2A**). Here, circRNAs derived from exons  
140 containing annotated start codons, coined AUG circRNA, comprise 5 out of the top 10 alpha  
141 circRNAs in both human and mouse samples, whereas the percentage of AUG circRNA in general is  
142 7-11% (**Fig. 2B** and **Supplementary Fig. 5A**). In fact, the AUG circRNAs in both human and mouse  
143 also show a significant over-representation in subsets of highly expressed circRNAs, which is not  
144 seen for other circRNA sub-classes (**Fig. 2B** and **Supplementary Fig. 5A**). Consistently, AUG circRNAs  
145 are generally and significantly more abundant than other circRNAs (**Supplementary Figs. 6A-D**) both  
146 in terms of absolute expression but also regarding the circular-to-linear ratios. .

147 Using liftover (UCSC) we evaluated the number of human circRNAs re-identified in the mouse  
148 dataset of circRNAs as a measure of conserved biogenesis. Similar to AUG circRNAs, the fraction of  
149 conserved circRNAs increase with expression (**Fig. 2C**). Focusing specifically on the top 1000 most  
150 abundant human circRNAs based on total backsplice junction (BSJ)-spanning reads, 39% of all AUG  
151 circRNAs are conserved comprising almost twice as many conserved species compared to the other  
152 circRNA sub-groups (**Fig. 2D**,  $p=3.8e-4$ , Fisher's exact test). As with the top10 alpha circRNAs, AUG  
153 circRNAs generally exhibit distal IAE and longer flanking introns (**Fig. 2E-F**). In fact, AUG circRNAs,  
154 conserved circRNAs and host gene exons exhibit an overall similar distribution of IAEs (**Fig. 2E**). In  
155 contrast, the flanking intron lengths effectively demarcate AUG circRNA and conserved circRNAs  
156 from host gene exons (**Fig. 2F**), which is also supported by the analysis of AUG circRNAs in mouse  
157 (**Supplementary Fig. 5B**). Based on the observations that AUG circRNAs are more conserved and  
158 overall devoid of flanking inverted *Alu* elements, we propose that AUG circRNAs are more likely to  
159 be biologically relevant and to utilize an *Alu*-independent biogenesis pathway.

160 To demarcate *Alu*-dependent from *Alu*-independent circRNAs, we empirically determined the  
161 distance to nearest IAE by which the cumulative fraction of circularizing exons differed the most  
162 from non-circularizing host exons. Here, approximately 45% of all human circRNAs has an inverted  
163 *Alu* element within 2300 nucleotides total distance, whereas this cut-off only applies to 22% of host  
164 exons (**Supplementary Fig. 7A**). We thus defined this 45% subset as the *Alu*-dependent circRNAs.  
165 Based on this demarcation, only 13% of *Alu*-dependent circRNAs are observed in mouse, which is  
166 consistent with the fact that *Alu* elements are primate specific (**Supplementary Fig. 7C**). In contrast,  
167 41% of *Alu*-independent and 31% of circRNAs with long flanking introns (defined empirically as  
168 flanking intron > 6500 nts, **Supplementary Fig. 7B**) are conserved (**Supplementary Fig. 7B**), which  
169 suggests that at least for the evolutionary relevant circRNAs, biogenesis relies more on having long  
170 flanking introns instead of proximal inverted *Alu* repeats. However, the requirement for long  
171 flanking introns in circRNA biogenesis is currently unclear, and therefore the mechanism governing  
172 production of the majority of abundant and conserved circRNAs remains undisclosed.

173 Recently, the RNA resolvase, Dhx9, was shown to inhibit circRNA production by unwinding and  
174 destabilizing RNA structures formed by inverted *Alu* elements in flanking regions of circRNAs (Aktas  
175 et al. 2017). Dhx9 is proposed to protect cells from adverse secondary structures in the nucleus. As  
176 a consequence, circRNAs sensitive to Dhx9 depletion are considered products of aberrant  
177 backsplicing mediated by random insertion of inverted repeat elements, and therefore these  
178 circRNAs are more likely to be functionally irrelevant. Based on RNAseq from Dhx9-depleted HEK293  
179 cells (**Supplementary Table 3**), it is possible to determine the subset of circRNAs sensitive to Dhx9  
180 expression. We selected the top 1000 expressed circRNAs from this experiment (**Supplementary**  
181 **Table 4**). Here, roughly 25% (275 circRNAs out of 1000) responds significantly ( $fdr < 0.05$ ) to the  
182 Dhx9 depletion (**Fig. 3A**), with a clear tendency towards proximal IAE and short flanking introns (**Figs.**  
183 **3B-C**). Consistently, 39% of circRNAs designated as *Alu* dependent (IAE distance < 2300nt) are Dhx9-  
184 sensitive compared to only 12% of the non-*Alu* circRNAs, whereas long flanking introns are generally  
185 insensitive to Dhx9 compared to short introns (43% vs 23%, **Supplementary Fig. 8D**). Interestingly,  
186 in alignment with the analyses described above, AUG circRNAs are significantly reduced in the Dhx9-  
187 sensitive fraction (5% vs 15%,  $p=4.8e7$ , **Fig. 3D**). In fact, only 10% of the AUG circRNAs compared to  
188 26% of non-AUG circRNAs is affected significantly in expression upon Dhx9 depletion (**Fig. 3E**).



189 CircHIPK3 has previously been characterized as an *Alu*-dependent circRNA (Zheng et al., 2016),  
190 however, it is also an AUG circRNA, as well as the overall highest expressed circRNA in the ENCODE  
191 data. As such, the IAEs are within 2300 nt (see **Fig. 3B**), and while the *Alu* elements could easily be  
192 important for biogenesis in an out-of-context minigene setup, circHIPK3 is insensitive to Dhx9  
193 depletion (**Fig. 3A**). This is also observed for the two additional top10 expressed AUG circRNAs,  
194 circSETD3 and circVRK1. Instead, the three AUG circRNAs in the top10 fraction all associate with  
195 very long flanking introns (**Fig. 3B**), and notably, circZBTB44, which in this analysis is termed  
196 ‘ambiguous’ because it overlaps both an AUG and a non-coding transcript, share the same features.  
197 Consistently, HITS-CLIP analysis of Dhx9 occupancy shows a clear selection for binding in the  
198 immediate flanking regions of *Alu*-dependent compared to *Alu*-independent circRNAs (**Fig. 3F** and  
199 **Supplementary Fig. 8E**), but also a clear preference for non-AUG over AUG circRNAs (**Fig. 3F** and  
200 **Supplementary Fig. 8F**). Collectively, this strongly indicates that the AUG circRNAs are generally not  
201 affected by Dhx9 helicase activity and thus not depending on IAE for biogenesis.

202

### 203 *No detectable protein production from ectopically expressed AUG circRNAs*

204 Recent studies have shown that circRNAs despite lacking a 5’cap and 3’poly(A)-tail are still capable  
205 of recruiting ribosomes and act as templates for protein synthesis (Legnini et al. 2017; Yang et al.  
206 2017; Pamudurti et al. 2017). This is most likely facilitated by IRES-like elements in the circRNA  
207 required for cap-independent translation. The AUG circRNAs all contain a 5’ part of a bona fide ORF,  
208 and translation of this putative ORF will in most cases produce a truncated protein mimicking the  
209 N-terminal part of the host-gene encoded protein. To test the hypothesis that AUG circRNAs are in  
210 fact protein-coding circRNAs, we initially focused on the two-exon AUG circRNAs derived from the  
211 LPAR1 gene (**Fig. 4A**). In the ENCODE data, circLPAR1 is the highest expressed circRNA in 21 samples,  
212 and it was the most abundant circRNA in one of the first global analyses of circRNA expression in a  
213 human fibroblast cell line, hs68 (Jeck et al. 2013). Here, circLPAR1 was shown to be 3-fold higher  
214 expressed than the second highest circRNA and resistant towards RNase R treatment. We  
215 constructed a minigene expression vector including the two exons of LPAR1 and a portion of the  
216 flanking introns (**Fig. 4B**). As with most other AUG circRNA, LPAR1 has no IAE in close proximity, and  
217 the mode of biogenesis is therefore currently unclear. To overcome this, we artificially inverted and



218 inserted part of the upstream intron downstream of the splice donor (**Fig. 4B**), which results in clean  
219 and efficient expression of circLPAR1 exhibiting RNase R resistance (**Figs. 4C and D**). The protein-  
220 coding ability of circLPAR1 was determined by the insertion of an eGFP tag just upstream of the stop  
221 codon in the putative ORF (**Fig. 4B**). Here, detection of the tags would only be possible if translation  
222 proceeds across the BSJ. First, we tested whether the insertion of eGFP would impede or alter the  
223 circularization of circLPAR1. As expected, the circLPAR1-eGFP shows changed migration but remains  
224 RNase R resistant (**Fig. 4D**). Then, we over-expressed the untagged and GFP-tagged variants of  
225 circLPAR1 in HEK293 cells and performed fluorescent microscopy and western blot analyses,  
226 however, in both cases we were unable to obtain any signal (**Figs. 4E and F**). Based on AUG circRNA,  
227 circSLC8A1, and the ambiguous AUG circRNA, circCDYL, similar vector-designs were constructed  
228 (**Supplementary Figs. 9A-B and 10A-B**) and effective circRNA production was observed  
229 (**Supplementary Figs. 9C-E and 10C-E**), however, once again no GFP-positive signal by western  
230 blotting or fluorescent microscopy was obtained (**Supplementary Figs. 9F-G and 10F-G**).  
231 Collectively, this suggests that these specific circRNAs are not subjected to translation under normal  
232 conditions in HEK293 cells.

233 In a parallel experiment using the largeT antigen transformed HEK293T cells, which normally show  
234 higher expression of ectopic transgenes, we surprisingly observed a faint GFP-positive band on the  
235 western and few GFP positive cells when overexpressing circLPAR1-eGFP. However this was seen  
236 both for LPAR1 vectors with or without artificial inverted elements and thus irrespective of  
237 circularization (**Supplementary Figs. 11A-E**). This suggests that in extreme conditions, exon-repeats  
238 are likely produced from 'rolling circle' read-through transcription on plasmid templates (see  
239 schematics in **Supplementary Fig. 11F**), and, presumably, this is particularly prevalent in circRNA  
240 expression vectors, as the vector-encoded polyA signal is situated downstream the SD and therefore  
241 subjected to U1-mediated repression (Kaida et al. 2010). Thus, vector-based overexpression may  
242 generate false positive protein products from capped mRNA indistinguishable from the predicted  
243 circRNA-derived peptides, and conclusions based on ectopic expression setups should be drawn  
244 with utmost caution.

245

246 *Putative ORFs are not conserved features in AUG circRNAs*

247 As shown above, AUG circRNAs are generally more conserved across species than other circRNAs  
248 (i.e. more often found in mouse as a circRNA). If the functional relevance of these AUG circRNAs is  
249 to encode protein, features specific for translation should also exert increased conservational  
250 restraint. We focused this analysis on the AUG circRNAs within the top1000 expressed circRNAs  
251 from the ENCODE analysis, and used the AUG-containing exon from 'other circRNA'-associated host-  
252 genes (termed the 'AUG exon') to include exons with comparable expression level but without any  
253 evidence of circularization as a control.

254 In theory, the circular topology allows for infinite ORFs without stop-codons. However, this is only  
255 predicted for a very small subset of AUG circRNAs (8% in both human and mouse, **Supplementary**  
256 **Figs. 12A and B**). For the remaining circRNAs, the predicted ORF terminates shortly after the BSJ  
257 (median length of 10 amino acids (aa) after BSJ, **Supplementary Figs. 12C and D**), which is very close  
258 to the expected geometric distribution of stop-codon frequency considering the overall 5'UTR  
259 nucleotide composition (**Supplementary Figs. 12E and F**). This suggests that the predicted lengths  
260 of the circRNA derived peptides are very close to what would be expected by chance.

261 The mRNA ORFs are typically highly conserved between species. In contrast, the 5'UTRs generally  
262 exhibit much lower evolutionary constraints. We compared the overall conservation of 5'UTRs, but  
263 only considering the AUG-containing exon (see schematics in **Fig. 5A**, upper panel). Here, AUG  
264 circRNAs show a significantly higher cross-species conservation compared to the control AUG exons  
265 (**Fig. 5A**). Next, to elucidate whether the increased conservation coincides with a putative ORF from  
266 the annotated AUG across the BSJ and into the 5'UTR, we determined the relative conservation of  
267 predicted stop-codons. As a positive control, we included the annotated stop-codon from the  
268 circRNA-derived host-genes (termed 'Host mRNA') in the analysis. Based on phastCons scores  
269 obtained from the UCSC genome browser, the relative conservation of stop-codon vs downstream  
270 triplet was plotted (**Fig. 5B**). This shows, as expected, a notable conservational enrichment of host  
271 mRNA stop-codons, however no significant difference between AUG circRNAs and AUG exons is  
272 observed, and not even when focusing the analysis on the conserved subset of AUG circRNAs. In  
273 agreement with our analysis of ORF lengths, this suggests that the putative stop-codon sequence is  
274 not under evolutionary constraints. Finally, we determined the third-nucleotide (the wobble)  
275 conservation relative to the two other nucleotides in every codon within the putative ORF after the

276 BSJ (**Fig. 5C**, schematic). Based on phyloP basewise conservation, the annotated mRNA ORFs show  
277 a clear and significant decrease in wobble nucleotide conservation, in accordance with previous  
278 analyses (Chamary et al. 2006). However, for the AUG circRNA, again, no differential conservation  
279 between the wobble position and the two other bases is observed, not even for the conserved  
280 subset of AUG circRNA (**Fig. 5C**), supporting the preliminary conclusion that the coding properties  
281 of AUG circRNAs are not conserved. Consistently, similar analyses on the murine repertoire of AUG  
282 circRNAs produce almost identical results (**Supplementary Figs. 13A-C**), suggesting little or no  
283 preservation of the circRNA-specific ORF, however, the exact peptide sequence encoded after the  
284 BSJ could be of less significance and therefore not under evolutionary pressure, but still the protein  
285 output could be functionally important.

286

#### 287 *AUG circRNAs are generally not templates for translation*

288 To assess the translational potential of circRNA globally, we took advantage of the wide range of  
289 ribosome profiling (RiboSeq) data currently available online: ~500 and ~1300 samples from human  
290 and mouse origin (**Supplementary Table 5**). After adapter-trimming, we obtained a total of  
291 approximately 22 and 24 billion reads between 25 and 35 nucleotides in length from human and  
292 mouse, respectively.

293 In general, the distance from the 5' end of footprinting reads to the ribosome P-site (P-site offset) is  
294 12 nts (Ingolia et al. 2009; Bazzini et al. 2014), however, for shorter and longer reads this offset  
295 varies (Dunn and Weissman 2016). Moreover, we noted that there was a large degree of p-site offset  
296 variation between samples, and consequently, we initially analyzed each sample individually by  
297 mapping all the 25-35 nt reads onto the *GAPDH* and *ACTB* (beta-actin) mRNAs. For each read-length,  
298 we determined the amount of on-frame P-sites for 12, 13, and 14 nts offsets and the associated p-  
299 value by binomial test (see example in **Supplementary Fig. 14**), which was used as a measure of  
300 dataset fidelity. Thus, in all samples, the efficiency by which each read length (25-35 nts) is able to  
301 demarcate translation from noise was determined (**Supplementary Fig. 15**). Here, for both species,  
302 the 28-31 nt reads show the highest abundance and fidelity (**Supplementary Fig. 16**).

303 We then applied the reads to circRNAs using the 5'offset with the lowest p-value in the above  
304 analysis. To evaluate translation of circRNA, the BSJ is the only circRNA-specific sequence. Therefore,  
305 we concatenated the circRNA exons on all the top 1000 expressed circRNAs from the ENCODE data  
306 to display the BSJ in a linear manner compatible with short read mapping. As above, we also included  
307 the AUG-containing exon from 'Other circRNA'-derived host genes ('AUG exon'), as well as  
308 'ambiguous AUG circRNAs', i.e. circRNAs derived from ambiguous host-gene isoforms of which at  
309 least one is annotated to contain the AUG start site (see schematics on **Fig. 6A**). By plotting the  
310 distribution of reads across the BSJ, only a small fraction of reads spans the BSJ compared to the  
311 immediate upstream regions (**Fig. 6B**). However, in contrast to previous reports (Guo et al., 2014;  
312 You et al., 2015), there is a notable fraction of BSJ-spanning reads defined here as P-site position  
313 from -8 to +6 relative to the BSJ (**Fig. 6B**) comprising a 15 nt stretch (5 codons). To ensure that BSJ-  
314 spanning reads are in fact likely derivatives of circRNAs, the reads were re-aligned to an assembled  
315 transcriptome allowing one mismatch. Particularly for the human RiboSeq data, this, discards the  
316 majority of reads spanning the BSJ on the 'AUG Exon' subset. In contrast, almost all reads mapping  
317 perfectly to the BSJ of bona fide circRNA have no detectable mRNA alignment (**Supplementary Figs.**  
318 **17A and B**). Now, when considering the likelihood of each read to actually derive from translating  
319 ribosomes, only ~20% of BSJ-spanning reads are from high quality samples (with  $fdr < 0.01$ ), whereas  
320 ~70% of the upstream-derived reads are of high quality (**Fig. 6C**). This suggests that across the BSJ,  
321 the quality of ribosome profiling data is of particular high relevance and that noise consumes most  
322 of the BSJ-spanning reads. This difference in quality is corroborated in mouse although here the  
323 difference in quality is less pronounced (**Supplementary Figs. 18A-C**). Nonetheless, to address  
324 translation across the BSJ, we filtered out the low quality reads ( $fdr > 0.01$ ) and used the remaining  
325 reads to determine whether phasing in accordance with translation of the putative ORFs is evident.  
326 Here, we simply counted the number of reads in-frame and out-of-frame on the 5 codon BSJ-  
327 spanning stretch and compared this to a 5 codon stretch immediately upstream the BSJ. For all  
328 subtypes of circRNA ('AUG circRNA', 'Ambiguous AUG circRNA', and 'Other circRNA') a roughly equal  
329 distribution of reads between all three frames is observed across the BSJ, whereas for the upstream  
330 region, approximately 50-60% of reads are in-frame, both for humans and mouse (**Fig. 6D** and  
331 **Supplementary Fig. 18D**). This strongly suggests that the AUG circRNAs as a whole, or any of the  
332 other circRNAs for that matter, are not subjected to translation as evidenced by RiboSeq analysis.

333 However, it is likely that a small and restricted subset of circRNAs is acting as templates for  
334 translation, and therefore the signal from these drown in the noise from others. To evaluate this,  
335 we analyzed all top1000 circRNAs with at least 10 BSJ-spanning RiboSeq reads individually. Here, in  
336 humans only circUBXN7 – an ambiguous AUG circRNA for which the annotated host gene has  
337 multiple start codons – shows an enrichment of in-frame reads although not significant when  
338 evaluating unique reads only (fdr (unique reads)=0.057, fisher’s exact test, **Fig. 6E**, unique reads  
339 shown in parentheses). Similarly, in mouse, no significant phasing of unique reads is observed across  
340 the circRNA BSJ (**Supplementary Fig. 18E**).

341

## 342 **Discussion and conclusion**

343 Here, by thorough disclosure of the circRNA landscape across human and murine tissues and cell  
344 lines, we have shown that a certain subclass of circRNAs, namely the AUG circRNAs, are abundantly  
345 expressed and conserved across species. Moreover, the AUG circRNAs associate with very long  
346 flanking introns and are devoid of flanking inverted *Alu* elements in contrast to most other circRNAs.  
347 The *Alu*-independent biogenesis is consolidated by analysis of RNAseq on Dhx9 depleted cells and  
348 Dhx9 HITS-CLIP, where AUG circRNAs generally are insensitive to Dhx9 perturbation and exhibit  
349 reduced Dhx9 binding in the flanking regions compared to other circRNAs. This strongly suggests  
350 that AUG circRNAs are not aberrant RNA species occasionally escaping the Dhx9-mediated  
351 surveillance. We conclude that most AUG circRNAs rely on an *Alu*-independent biogenesis that most  
352 likely depend on the length of the flanking introns and, presumably, the specific splicing kinetics  
353 involved in long-intron excision, as well as the prevalence and availability of specific splicing factors,  
354 as suggested previously (Liang et al. 2017). Whether this is an intrinsic part of long-intron splicing or  
355 whether certain trans-acting factors are required for backsplicing is currently unknown, and as such,  
356 the exact production of the most abundant and conserved circRNAs remains elusive.

357 Based on cross-species sequence analysis, the 5’UTR sequences contained within AUG circRNAs are  
358 overall more conserved than other non-circular 5’UTR elements. However, based on single  
359 nucleotide constraints, this conservation is not due to circRNA-specific ORFs. Consistently, upon  
360 overexpression of three different AUG circRNAs, no circRNA-specific peptides were detected. And

361 finally, thorough and extensive RiboSeq analysis suggests that BSJ-spanning reads are not derived  
362 from translating ribosomes. Collectively, this argues that circRNAs in general, and AUG circRNAs  
363 specifically, are not subjected to translation. It should be emphasized that our analyses do not  
364 necessarily exclude inefficient translation of circRNAs or restricted translation solely under specific  
365 conditions. Moreover, it is also possible that a small subset of circRNAs, such as circMbl and  
366 circZNF609 (Pamudurti et al. 2017; Legnini et al. 2017), indeed engage in protein production.  
367 However, our data strongly point towards translation of circRNAs as being a rare and uncommon  
368 process.

369 Since the functional characterization of ciRS-7 as a dedicated miR-7 sponge or regulator, many  
370 examples of circRNAs acting as miRNA sponges have been proposed. Apart from the 70+ selectively  
371 conserved miR-7 sites on ciRS-7, the miRNA sponge potential seems not to be a conserved feature  
372 of circRNAs (Guo et al. 2014). Moreover, stoichiometric analysis of circRNA:miRNA:mRNA ratios  
373 suggests little or no overall effect upon circRNA-mediated miRNA inactivation (Denzler et al. 2014;  
374 Jens and Rajewsky 2015), highlighting that the notion of circRNAs as miRNA sponges is very  
375 controversial.

376 Instead, specifically for the AUG circRNAs, expressing translationally inert canonical start codons in  
377 its natural sequence context could be useful in certain scenarios, e.g. as binding platforms for or  
378 regulators of translation factors in the cytoplasm, and using the circular topology for this purpose  
379 seems plausible, although the same stoichiometric issues as for the miRNA sponge hypothesis may  
380 apply here. It is possible that the functional relevance of one particular AUG circRNA is very subtle,  
381 but that the accumulated contribution of all the circRNAs are of physiological importance. As such,  
382 the highly stable and durable circRNAs could constitute a background of non-responsive RNA  
383 entities in the cell to ensure robustness by transiently associating with RNA-binding proteins in the  
384 cytoplasm thereby reducing non-specific and potentially detrimental RNA-protein interactions. In  
385 any case, future research will undoubtedly shed light on the elusive mechanism by which these  
386 highly abundant circRNA species are produced and more interestingly elucidate the functional  
387 capabilities of AUG circRNAs.

388

## 389 **Materials and Methods**

### 390 *Plasmids*

391 All plasmids were generated by PCR with subsequent restriction digest and ligation into pcDNA3  
392 (Invitrogen). Primers are listed in **Supplementary Table 6**.

### 393 *Cell lines and transfection*

394 HEK293 *Flp-In<sup>TM</sup> T-Rex<sup>TM</sup>* cells (Invitrogen) or HEK293T cells (ATCC) were used for all experiments.  
395 The cells were cultured in Dulbecco's modified Eagle's media (DMEM) with GlutaMAX (Thermo  
396 Fischer Scientific) supplemented with 10 % foetal bovine serum (FBS) and 1 %  
397 penicillin/streptomycin sulphate. The cells were kept at 37 °C and 5 % CO<sub>2</sub>. Transient transfections  
398 were carried out using calcium phosphate as transfection reagent using standard procedures or  
399 Lipofectamine Reagent 2000 (Invitrogen) accordingly to manufacturers protocol. After 24 hours, the  
400 media was changed and 48 hours post transfection cells were harvested either by resuspension in  
401 a) 2xSDS loading buffer (for western blotting) or b) TRIzol Reagent (Thermo Fisher Scientific) (for  
402 RNA purification) adhering to manufacturer's protocol (see below).

### 403 *Northern blotting*

404 Northern blotting was performed as described in (Hansen 2018a). Briefly, 10 µl RNA (1g/l) and 20  
405 µL northern loading buffer [58,8% formamide, 6,5% formaldehyde, ethidium bromide, 1,18% MOPS,  
406 bromophenol blue] were mixed and denatured at 65°C for 5 minutes. The RNA was separated by  
407 electrophoresis on a 1,2% agarose gel containing 3% formaldehyde and 1x MOPS at 75 V. After  
408 electrophoresis, the gel was briefly washed in water and exposed to UV to visualize the EtBr stained  
409 rRNA bands. The gel was transferred to a Hybond N+ membrane (GE Healthcare) over-night (O/N)  
410 in 10xSSC. Then, the membrane was UV cross-linked and pre-hybridized in Church buffer [0,158 M  
411 NaH<sub>2</sub>PO<sub>4</sub>, 0,342 M Na<sub>2</sub>HPO<sub>4</sub>, 7 % SDS, 1 mM EDTA, 0.5 % BSA, pH 7.5] for one hour at 55°C and  
412 subsequently probed with a 5' radioactively labelled DNA oligonucleotide (see **Supplementary**  
413 **Table 6**) at 55 °C O/N. The next day, the membrane was washed twice in 2 x SSC, 0.1 % SDS for 5  
414 minutes and twice in 0,2xSSC, 0,1% SDS for 15 minutes. All washes were carried out at 50°C. Finally,  
415 the membrane was exposed on a phosphoimager screen and analyzed using Quantity One<sup>®</sup> or



416 Image Lab™ software (Bio Rad). Membranes were stripped in boiling stripping buffer [0,1% SDS, 1  
417 mM EDTA].

#### 418 *RNase R*

419 For RNase R experiments, 4 µg RNA was digested with 4 U RNase R (Epicentre) in a total reaction  
420 volume of 10 µL for 10 minutes at 37 °C. Then, 20 µL northern loading buffer was added, heated at  
421 65°C for 5 minutes before loading on an agarose northern gel, see above.

#### 422 *Western blotting*

423 Cells were harvested in 1xPBS and centrifuged at 1200 rpm at 4°C for 5 min. The supernatant was  
424 removed and cell pellet was lysed directly and resuspended in 2xSDS loading buffer [125 mM Tris-  
425 HCl, pH 6.8, 20 % glycerol, 5 % SDS, 0,2 M DTT]. After resuspension, the samples were boiled at 95°C  
426 for 5 minutes before loading 1 % on a 10 % Tris-Glycine SDS-PAGE gel with 10 µL PageRuler Plus  
427 Prestained Protein Ladder (Thermo Scientific). After approximately 1 ½ hours electrophoresis  
428 proteins were immobilized on an Immobilon-P Transfer Membrane (EMD Milipore) O/N in a wet-  
429 blotting chamber. The next day, the membrane was pre-incubated at RT with 20 % skim milk to  
430 block unspecific binding for 1 hr. Then, primary antibody (**Supplementary Table 6**) in blocking  
431 solution was added and incubated 1 hour at RT, followed by 1 hour incubation with secondary  
432 antibody in blocking solution. After each antibody incubation, the membrane was washed 3x5 min  
433 in 1xPBS with 0,05 % Tween 20 and subsequently with 1x5 min wash with 1xPBS. Exposure was  
434 performed using SuperSignal West Femto Maximum Sensitivity Substrate kit (Thermo Scientific) and  
435 Amersham Hyperfilm ECL (GE Healthcare).

#### 436 *Microscopy*

437 48 hours after transfection, cells were imaged live using phase contrast and fluorescence  
438 microscopy with normal FITC filter set (using 1-second exposure, ISO200) on an Olympus IX73  
439 microscope. Images were merged using ImageJ.

#### 440 *RNAseq datasets and CircRNA detection*

441 Raw RNA sequencing data was downloaded from the ENCODE Consortium  
442 ([www.encodeproject.org](http://www.encodeproject.org)) or the NCBI Gene Expression Omnibus ([www.ncbi.nlm.nih.gov/geo/](http://www.ncbi.nlm.nih.gov/geo/)) (See

443 **Supplementary Tables 1 and 3**). CircRNA prediction was performed by find\_circ (Memczak et al.  
444 2013) and circexplorer2 (Zhang et al. 2016) adhering to the recommendation by the authors. For  
445 find\_circ, an increased stringency threshold was used requiring that both adaptor sequences map  
446 with highest possible mapping quality (mapq=40) (Hansen 2018b). Moreover, for find\_circ and  
447 CIRCexplorer2, only circRNAs supported by at least two reads in a given sample was kept. CircRNAs  
448 found by both algorithms with the above-mentioned stringency were used in subsequent analyses.  
449 CircRNA expression was based on BSJ-spanning reads according to find\_circ quantification. Likewise,  
450 the circular-to-linear ratio was determined by the total number of BSJ-spanning reads multiplied by  
451 two and divided by the total number of linear spliced reads spanning the upstream and downstream  
452 splice sites, respectively, as determined by find\_circ. RPM values were calculated for each sample  
453 as the number of BSJ-spanning reads divided by the total number of reads. mRNA expression (FPKM  
454 values) was quantified using cufflinks (Trapnell et al. 2010).

#### 455 *circRNA annotation*

456 Annotation of circRNAs was based on UCSC Genes tracks (hg19 and mm10). First, the annotation  
457 database was queried for host-genes sharing both the circRNA-specific splice sites. If none were  
458 found, genes sharing at least one splice-site were queried, and as a last resort, genes fully covering  
459 the circRNA locus were retrieved. Similarly, host gene exons were retrieved from annotated  
460 isoforms sharing both circRNA producing splice-sites but omitting first and last exons as well as the  
461 exons with splice-sites coinciding with the circRNA, and duplicate exons were discarded. The  
462 circRNA subclass, i.e. 'AUG circRNA', 'CDS circRNA' etc, was only determined based on host-gene  
463 ORF annotation, and if multiple host-gene entries were recovered with divergent annotation, the  
464 circRNA was categorized as 'Ambiguous'. To guide detection of circRNAs by circExplorer2 and to  
465 facilitate proper annotation of known circRNAs, two additional entries were manually added to the  
466 gene annotation database (shown in **Supplementary Table 7**). Flanking intron lengths were based  
467 on the host-gene exon-intron structure immediately upstream and downstream the back-splicing  
468 splice sites. In case of multiple isoforms with varying intron length, the mean of all flanking introns  
469 found was calculated. To extract the distance to nearest flanking inverted *Alu* element, the UCSC  
470 Repeatmasker tracks (hg19 and mm10) were used. Here, the 20 most proximal but flanking *Alu*

471 elements were retrieved irrespective of intron-exon structure on either side of the circRNA, and  
472 based on these, the closest possible inverted pair was determined.

#### 473 *HITS CLIP analysis*

474 For HITS-CLIP analyses, reads were adaptor-trimmed using trim\_galore and barcodes were  
475 subsequent removed. The reads were pair-wised mapped on to the human genome (hg19) using  
476 bowtie2 using default settings, and mapped reads were extracted using samtools. Reads mapping  
477 in the flanking introns within 1000bp of the back-splicing splice-sites were counted and compared.

#### 478 *Conservation of Open reading frame (ORF)*

479 For 'AUG circRNAs' and 'AUG exons', the ORF was predicted based on the annotated start codon  
480 whereas for 'Other circRNAs', the longest finite ORF traversing the BSJ was used. Infinite ORFs were  
481 not considered in this analysis. In case of multiple isoforms, i.e. alternative exons within the  
482 circRNAs, all isoforms were considered equally in the analysis. The 5'UTR conservation and stop-  
483 codon conservation were based on the phastCons scores from 100 species (UCSC) using the hg19 or  
484 mm10 reference for human and mouse, respectively. For 5'UTRs, only the AUG-containing exon was  
485 analyzed, and for stop-codons, the stop-codon triplet and the immediate downstream triplet  
486 irrespective of position was evaluated. For wobble position analysis, only the circRNA-specific ORF  
487 within the 5'UTR was analyzed. Here, for each position (1<sup>st</sup>, 2<sup>nd</sup> and wobble) in each codon, the  
488 PhyloP scores from 100 species (UCSC) was retrieved and analyzed. The ORF lengths were based on  
489 number of codons from BSJ to stop, and the geometric distribution of stop codon probability  
490 considering the frequency of the individual nucleotides in the 5'UTR region was used to determine  
491 the expected ORF lengths.

#### 492 *RiboSeq analysis*

493 Ribosome profiling (RiboSeq) datasets (see **Supplementary Table 5**) were trimmed using  
494 trim\_galore and only reads between 25 and 35 nucleotides in length were kept and mapped onto  
495 *GAPDH* and *ACTB* mRNA (UCSC accessions; uc001qop.2 and uc003sot.4, or uc009dts.2 and  
496 uc009ajk.2, for human and mouse, respectively). For each read-length in each RiboSeq sample, an  
497 offset of 12, 13 or 14 nucleotides was tested to determine the best possible offsetting based on one-  
498 tailed binomial tests, e.g. how many codons exhibit more on-frame than off-frame reads (see

499 **Supplementary Figs. 14-16).** The offset with the lowest mean p-value (obtained from *GAPDH* and  
500 *ACTB*) was used for each given read-length in a given sample. All reads were then mapped to  
501 concatenated mature circRNA sequences with bowtie allowing no mismatches using the following  
502 arguments: *bowtie -S -a -v 0*. The offset from the quality assessment on *GAPDH* and *ACTB* was used  
503 to obtain p-site position. P-sites within [-8;6] relative to the BSJ was defined as BSJ-spanning  
504 whereas P-sites immediately upstream the SD [-31;-17] was defined as linear upstream reads.  
505 Putative BSJ-spanning reads were mapped against an mRNA reference (build on UCSC annotations)  
506 with one mismatch tolerance: *bowtie -f -v 1*, and omitted from downstream analysis if mapped. The  
507 annotated AUG was used to predict the circRNA-specific ORF, however in 'Other circRNAs', the  
508 longest possible ORF traversing the BSJ was used. P-site positions relative to the predicted frames  
509 were counted and analyzed. The statistical significance of the proportion of in-frame reads was  
510 determined by Fisher's exact test.

#### 511 *Statistical analyses*

512 All statistical analyses are based on Wilcoxon Rank-sum tests except if explicitly noted otherwise.  
513 Fdr-values reflect Benjamini-Hochberg-adjusted p-values.

514

## 515 **Figure Legends**

516 **Figure 1: Abundant circRNAs.** **A)** Venndiagram showing the number of exotic (orange) and shared  
517 (blue) circRNAs found by find\_circ and circexplorer2 algorithms in the ENCODE datasets. **B)**  
518 Smoothed fraction of shared circRNAs found by find\_circ and circexplorer2 as a function of ranked  
519 expression. **C)** Scatterplot depicting the number of backsplice junction (BSJ)-spanning reads  
520 obtained from find\_circ and circexplorer2 across all the samples analyzed. The points are color-  
521 coded as shared (blue) or exotic (orange). **D)** The alpha frequency of the top10 most commonly  
522 found alpha circRNAs as well as the frequency of being an abundant circRNA (i.e. one of the top10  
523 expressed circRNAs in a sample) are plotted as a stacked barplot. **E)** Schematic illustration of the  
524 flanking intron length and inverted *Alu* element (IAE). **F)** Boxplot comparing the distance to inverted  
525 repeat element and flanking intron length for circRNAs in general (n=81589), host gene exons  
526 (n=131002) and the top10 alpha circRNAs. \*, p < 0.05; \*\*, p < 0.01, Wilcoxon rank-sum test. **G)**

527 Density-colored scatterplot showing relationship between IAE and flanking intron length for all  
528 circRNAs (left) and host gene exons (right). The top10 alpha circRNAs are highlighted to the left.

529 **Figure 2: The AUG circRNAs.** **A)** Schematics showing circRNA annotation. **B)** Frequency of circRNA-  
530 annotations for either all circRNA, the top 1000, top 100, top 10 circRNAs based on overall  
531 expression (RPM), and the top 10 alpha circRNAs, color-coded as denoted. P-values are calculated  
532 using Fisher's exact test. **C)** Smoothed relationship between circRNA expression and frequency of  
533 AUG containing circRNA and conservation to mouse, i.e. found as circRNA in mouse ENCODE  
534 RNAseq. **D)** Based on the top 1000 expressed circRNAs, the fraction of circRNAs found in mouse  
535 stratified by annotation is shown. P-value is calculated using Fisher's exact test using AUG and non-  
536 AUG stratification. **E-F)** Inverted Alu element (IAE) distance (E) and flanking intron length (F) for  
537 circRNAs stratified by annotation or by conservation, as well as host gene exons. For flanking intron  
538 length (F), only circRNAs and exons with annotated up- and downstream introns were included in  
539 the analysis. P-values are based on Wilcoxon rank-sum tests, and where 'AUG circRNAs' are  
540 compared to 'Other circRNAs' and 'Ambiguous circRNAs', only the highest obtained p-value is  
541 denoted.

542 **Figure 3: AUG circRNAs are DHX9-resistant.** **A)** Volcanoplot on top 1000 expressed circRNAs from  
543 Aktas *et al*, 2017, showing circRNA deregulation upon DHX9 knockdown color-coded by fold-change  
544 significance ( $\text{fdr} < 0.05$ ). The top 10 expressed circRNAs are highlighted and color-coded by  
545 annotation. **B)** Scatterplot showing flanking intron length by flanking Alu distance. Here, as in (A)  
546 the top 10 expressed circRNAs are highlighted. **C)** Boxplot showing the distribution of IAE distance  
547 and flanking intron length for circRNAs stratified by Dhx9 sensitivity. **D)** Frequency of circRNA-  
548 annotations for circRNAs resistant or sensitive towards Dhx9 knockdown. P-value is calculated by  
549 Fisher's exact test using AUG and non-AUG stratification. **E)** Within the top1000 expressed circRNA,  
550 the fraction of Dhx9-sensitive species are grouped by annotation and plotted. **F)** Cumulative plot  
551 showing the number of Dhx9 HITS-CLIP reads in the flanking vicinity (within 1kb upstream and  
552 downstream of the SA and SD, respectively) of circRNAs. Here, the circRNAs were stratified by either  
553 genic annotation or Dhx9 sensitivity. P-values are calculated by Wilcoxon rank-sum test, and refer  
554 to the 'AUG circRNA' vs 'Other circRNA' and 'DHX9 sensitive' vs 'DHX9 resistant' subgroups.

555 **Figure 4: No evidence of circLPAR1 translation.** **A)** Genomic representation of the *LPAR1* hostgene  
556 locus. The exons are not drawn to scale. **B)** Schematic representation of expression vectors  
557 comprising the CMV promoter, exons 2 and 3 known to circularize, the putative circRNA-specific  
558 stop-codon (cSTOP), the insertion of eGFP ORF, the flanking regions (divergent arrows indicate  
559 artificially introduced inverted element) and the BGH pA signal. **C-D)** Northern blot analysis of total  
560 RNA from ectopic overexpression of circLPAR1 vectors as denoted in HEK293 cells (C) or RNA with  
561 or without RNase R treatment (D). The membranes were probed for circLPAR1 as denoted to the  
562 right (top panels), and 18S (obtained by ethidium bromide stain) serves as loading and RNase R  
563 control (bottom panels). **E)** Western blot showing GFP expression in HEK293 cells transfected with  
564 positive control (pcDNA-eGFP) or circLPAR1-eGFP fusion. **F)** Merged phase contrast and GFP  
565 fluorescence images (PC/GFP) obtained from HEK293 cells transfected with vectors as denoted.

566 **Figure 5: No evolutionary preservation of Open-Reading-Frames in AUG circRNAs.** **A)** PhastCons  
567 analysis of 5'UTRs within the AUG-containing exon performed on AUG-containing exons in  
568 conserved and non-conserved AUG circRNAs, as well as AUG-containing exons from non-circular  
569 AUG exons. The 5'UTRs (transparent red and transparent grey) and representative phastCons tracks  
570 are depicted for 'AUG circRNAs' and 'AUG exons', respectively, in the above schematics. **B)** Analysis  
571 of stop codon conservation compared to immediately downstream triplet on putative circRNA-  
572 derived ORF as exemplified by circSLC8A1 to the right stratified by annotation as in (A). Similar  
573 analysis on bona-fide stop-codons within host-gene ORFs is included. **C)** PhyloP analysis of single-  
574 position conservation for 1<sup>st</sup>, 2<sup>nd</sup> and wobble-position for bona-fide ORFs within host-genes and  
575 putative ORFs after BSJ as exemplified to the right by circSLC8A1. N denotes number of codons  
576 analyzed.

577 **Figure 6: Ribosome profiling reads across BSJ.** **A)** Schematics showing circRNA annotation of 'AUG  
578 circRNA', 'Ambiguous circRNA', and 'Other circRNA'. **B)** Based on Ribosome profiling datasets, the  
579 number of ribosome P-sites around the backsplice junction (BSJ) were counted for each subclass of  
580 circRNA ('AUG circRNA', 'Ambiguous AUG circRNAs', and 'Other circRNA', see text for more detail).  
581 The AUG-containing exon from non-AUG ('AUG exon') circRNA host-genes. The plot is color-scaled  
582 according to the associated read-class p-value (See **Supplementary Figs. 14 and 15**). The grey box  
583 denotes the defined P-site position of BSJ-spanning reads, from pos -8 to +6 relative to the BSJ. **C)**

584 Based on all BSJ-spanning reads (P-sites from -8 to +6 relative to BSJ) and upstream reads (-31 to –  
585 17 relative to BSJ), the p-value distribution based on RiboSeq quality assessment is shown. **D)**  
586 Phasing of reads across BSJ. Here, based solely on high quality reads ( $p < 0.01$ ), the fraction of P-sites  
587 in-frame and out-of-frame across the BSJ (-8 to +6) are shown for each subclass of circRNA. The  
588 number below the plot represent total number of reads analyzed, whereas the numbers inside the  
589 plot reflect total or unique (in parenthesis) counts within each frame. **E)** As in (D), but for each  
590 individual circRNA with 10+ reads across the BSJ. P-values in (D) and (E) represent fisher’s exact tests  
591 on a contingency table comprising the observed and expected number of on- and off framed reads.

592

## 593 **Acknowledgements**

594 We would like to thank Karoline Krogh Ebbesen for the insightful discussions and critical reading of  
595 the manuscript. This work was supported by the Novo Nordisk Foundation (NNF16OC0019874 to  
596 T.B.H)

597

## 598 **References**

- 599 Aktaş T, Avşar İlik İ, Maticzka D, Bhardwaj V, Pessoa Rodrigues C, Mittler G, Manke T, Backofen R,  
600 Akhtar A. 2017. DHX9 suppresses RNA processing defects originating from the Alu invasion of  
601 the human genome. *Nature* **544**: 115–119.  
602 <http://www.nature.com/doi/10.1038/nature21715> (Accessed September 5, 2017).
- 603 Ashwal-Fluss R, Meyer M, Pamudurti NR, Ivanov A, Bartok O, Hanan M, Evantal N, Memczak S,  
604 Rajewsky N, Kadener S. 2014. circRNA biogenesis competes with pre-mRNA splicing. *Mol Cell*  
605 **56**: 55–66.
- 606 Bachmayr-Heyda A, Reiner AT, Auer K, Sukhbaatar N, Aust S, Bachleitner-Hofmann T, Mesteri I,  
607 Grunt TW, Zeillinger R, Pils D. 2015. Correlation of circular RNA abundance with proliferation--  
608 exemplified with colorectal and ovarian cancer, idiopathic lung fibrosis, and normal human  
609 tissues. *Sci Rep* **5**: 8057. <http://www.ncbi.nlm.nih.gov/pubmed/25624062>.



- 610 Bartel DP. 2009. MicroRNAs: target recognition and regulatory functions. *Cell* **136**: 215–233.
- 611 Bazzini AA, Johnstone TG, Christiano R, MacKowiak SD, Obermayer B, Fleming ES, Vejnar CE, Lee  
612 MT, Rajewsky N, Walther TC, et al. 2014. Identification of small ORFs in vertebrates using  
613 ribosome footprinting and evolutionary conservation. *EMBO J* **33**: 981–993.
- 614 Böhmendorfer G, Wierzbicki AT. 2015. Control of Chromatin Structure by Long Noncoding RNA. *Trends*  
615 *Cell Biol* **25**: 623–32. <http://www.ncbi.nlm.nih.gov/pubmed/26410408> (Accessed September  
616 1, 2017).
- 617 Chaiteerakij R, Zhang X, Addissie BD, Essa A, Harmsen WS, Theobald PJ, Peters BE, Joseph G, Ward  
618 MM, Giama NH, et al. 2017. Circular RNA MTO1 acts as the sponge of miR-9 to suppress  
619 hepatocellular carcinoma progression. *Hepatology* 2–43.
- 620 Chamary J V., Parmley JL, Hurst LD. 2006. Hearing silence: Non-neutral evolution at synonymous  
621 sites in mammals. *Nat Rev Genet* **7**: 98–108.
- 622 Cocquerelle C, Mascrez B, Hetuin D, Bailleul B, Héтуin D, Bailleul B. 1993. Mis-splicing yields circular  
623 RNA molecules. *FASEB J* **7**: 155–160.
- 624 Conn SJ, Pillman KA, Toubia J, Conn VM, Salmanidis M, Phillips CA, Roslan S, Schreiber AW, Gregory  
625 PA, Goodall GJ. 2015. The RNA binding protein quaking regulates formation of circRNAs. *Cell*  
626 **160**: 1125–1134.
- 627 Denzler R, Agarwal V, Stefano J, Bartel DP, Stoffel M. 2014. Assessing the ceRNA Hypothesis with  
628 Quantitative Measurements of miRNA and Target Abundance. *Mol Cell* **54**: 766–776.
- 629 Dunn JG, Weissman JS. 2016. Plastid: Nucleotide-resolution analysis of next-generation sequencing  
630 and genomics data. *BMC Genomics* **17**.
- 631 Ebbesen KK, Kjems J, Hansen TB. 2016. Circular RNAs: Identification, biogenesis and function.  
632 *Biochim Biophys Acta* **1859**: 163–168.
- 633 ENCODE Project Consortium TEP. 2012. An integrated encyclopedia of DNA elements in the human  
634 genome. *Nature* **489**: 57–74. <http://www.ncbi.nlm.nih.gov/pubmed/22955616> (Accessed  
635 September 1, 2017).

- 636 Guo JU, Agarwal V, Guo H, Bartel DP. 2014. Expanded identification and characterization of  
637 mammalian circular RNAs. *Genome Biol* **15**: 409–014–0409–z.
- 638 Hansen TB. 2018a. Characterization of circular RNA concatemers. In *Methods in Molecular Biology*,  
639 Vol. 1724 of, pp. 143–157 [http://link.springer.com/10.1007/978-1-4939-7562-4\\_12](http://link.springer.com/10.1007/978-1-4939-7562-4_12) (Accessed  
640 January 26, 2018).
- 641 Hansen TB. 2018b. Improved circRNA Identification by Combining Prediction Algorithms. *Front Cell*  
642 *Dev Biol* **6**. <http://journal.frontiersin.org/article/10.3389/fcell.2018.00020/full>.
- 643 Hansen TB, Jensen TI, Clausen BH, Bramsen JB, Finsen B, Damgaard CK, Kjems J. 2013a. Natural RNA  
644 circles function as efficient microRNA sponges. *Nature* **495**: 384–388.  
645 <http://www.ncbi.nlm.nih.gov/pubmed/23446346>.
- 646 Hansen TB, Kjems J, Damgaard CK. 2013b. Circular RNA and miR-7 in Cancer. *Cancer Res* **73**: 5609–  
647 5612.
- 648 Hansen TB, Veno MT, Damgaard CK, Kjems J, Venø MT, Damgaard CK, Kjems J. 2015. Comparison of  
649 circular RNA prediction tools. *Nucleic Acids Res* **gkv1458**.
- 650 Hansen TB, Wiklund ED, Bramsen JB, Villadsen SB, Statham AL, Clark SJ, Kjems J. 2011. miRNA-  
651 dependent gene silencing involving Ago2-mediated cleavage of a circular antisense RNA. *EMBO*  
652 *J* **30**: 4414–4422. <http://www.ncbi.nlm.nih.gov/pubmed/21964070>.
- 653 Ingolia NT, Ghaemmaghami S, Newman JRS, Weissman JS. 2009. Genome-wide analysis in vivo of  
654 translation with nucleotide resolution using ribosome profiling. *Science (80- )* **324**: 218–223.
- 655 Jeck WR, Sorrentino JA, Wang K, Slevin MK, Burd CE, Liu J, Marzluff WF, Sharpless NE. 2013. Circular  
656 RNAs are abundant, conserved, and associated with ALU repeats. *RNA* **19**: 141–57.  
657 [http://www.pubmedcentral.nih.gov/articlerender.fcgi?artid=3543092&tool=pmcentrez&rend](http://www.pubmedcentral.nih.gov/articlerender.fcgi?artid=3543092&tool=pmcentrez&rendertype=abstract)  
658 [ertype=abstract](http://www.pubmedcentral.nih.gov/articlerender.fcgi?artid=3543092&tool=pmcentrez&rendertype=abstract).
- 659 Jens M, Rajewsky N. 2015. Competition between target sites of regulators shapes post-  
660 transcriptional gene regulation. *Nat Rev Genet* **16**: 113–126.
- 661 Kaida D, Berg MG, Younis I, Kasim M, Singh LN, Wan L, Dreyfuss G. 2010. U1 snRNP protects pre-

- 662 mRNAs from premature cleavage and polyadenylation. *Nature* **468**: 664–668.  
663 <http://www.ncbi.nlm.nih.gov/pubmed/20881964> (Accessed May 23, 2018).
- 664 Legnini I, Di Timoteo G, Rossi F, Morlando M, Briganti F, Sthandier O, Fatica A, Santini T, Andronache  
665 A, Wade M, et al. 2017. Circ-ZNF609 Is a Circular RNA that Can Be Translated and Functions in  
666 Myogenesis. *Mol Cell* **66**: 22–37.e9.
- 667 Li X, Liu C-X, Xue W, Zhang Y, Jiang S, Yin Q-F, Wei J, Yao R-W, Yang L, Chen L-L. 2017. Coordinated  
668 circRNA Biogenesis and Function with NF90/NF110 in Viral Infection. *Mol Cell* **67**: 214–227.e7.  
669 <http://www.ncbi.nlm.nih.gov/pubmed/28625552> (Accessed September 1, 2017).
- 670 Li Z, Huang C, Bao C, Chen L, Lin M, Wang X, Zhong G, Yu B, Hu W, Dai L, et al. 2015. Exon-intron  
671 circular RNAs regulate transcription in the nucleus. *Nat Struct Mol Biol* **22**: 256–264.  
672 <http://www.nature.com/nsmb/journal/v22/n3/full/nsmb.2959.html>  
673 <http://www.nature.com/nsmb/journal/v22/n3/pdf/nsmb.2959.pdf>.
- 674 Liang D, Tatomer DC, Luo Z, Wu H, Yang L, Chen L-L, Cherry S, Wilusz JE. 2017. The Output of Protein-  
675 Coding Genes Shifts to Circular RNAs When the Pre-mRNA Processing Machinery Is Limiting.  
676 *Mol Cell* **68**: 940–954.e3. <http://www.ncbi.nlm.nih.gov/pubmed/29174924> (Accessed May 23,  
677 2018).
- 678 Memczak S, Jens M, Elefsinioti A, Torti F, Krueger J, Rybak A, Maier L, Mackowiak SD, Gregersen LH,  
679 Munschauer M, et al. 2013. Circular RNAs are a large class of animal RNAs with regulatory  
680 potency. *Nature* **495**: 333–338. <http://www.ncbi.nlm.nih.gov/pubmed/23446348>.
- 681 Pamudurti NR, Bartok O, Jens M, Ashwal-Fluss R, Stottmeister C, Ruhe L, Hanan M, Wyler E, Perez-  
682 Hernandez D, Ramberger E, et al. 2017. Translation of CircRNAs. *Mol Cell* **66**: 9–21.e7.  
683 <http://www.ncbi.nlm.nih.gov/pubmed/28344080> (Accessed August 31, 2017).
- 684 Peng L, Chen G, Zhu Z, Shen Z, Du C, Zang R, Su Y, Xie H, Li H, Xu X, et al. 2016. Circular RNA ZNF609  
685 functions as a competitive endogenous RNA to regulate AKT3 expression by sponging miR-150-  
686 5p in Hirschsprung's disease. *Oncotarget* **5**: 808–818.  
687 <http://www.oncotarget.com/abstract/13656>.
- 688 Rybak-Wolf A, Stottmeister C, Glažar P, Jens M, Pino N, Hanan M, Behm M, Bartok O, Ashwal-Fluss

- 689 R, Herzog M, et al. 2015. Circular RNAs in the Mammalian Brain Are Highly Abundant,  
690 Conserved, and Dynamically Expressed. *Mol Cell* **58**: 870–885.
- 691 Salzman J, Gawad C, Wang PL, Lacayo N, Brown PO. 2012. Circular RNAs are the predominant  
692 transcript isoform from hundreds of human genes in diverse cell types. *PLoS One* **7**: e30733.
- 693 Trapnell C, Williams BA, Pertea G, Mortazavi A, Kwan G, Van Baren MJ, Salzberg SL, Wold BJ, Pachter  
694 L. 2010. Transcript assembly and quantification by RNA-Seq reveals unannotated transcripts  
695 and isoform switching during cell differentiation. *Nat Biotechnol* **28**: 511–515.
- 696 Venø MT, Hansen TB, Venø ST, Clausen BH, Grebing M, Finsen B, Holm IE, Kjems J, Venø MT, Hansen  
697 TB, et al. 2015. Spatio-temporal regulation of circular RNA expression during porcine  
698 embryonic brain development. *Genome Biol* **16**: 243–245.  
699 [http://www.pubmedcentral.nih.gov/articlerender.fcgi?artid=4635978&tool=pmcentrez&rend](http://www.pubmedcentral.nih.gov/articlerender.fcgi?artid=4635978&tool=pmcentrez&rendertype=abstract)  
700 [ertype=abstract](http://www.pubmedcentral.nih.gov/articlerender.fcgi?artid=4635978&tool=pmcentrez&rendertype=abstract).
- 701 Wang Y, Wang Z. 2015. Efficient backsplicing produces translatable circular mRNAs. *RNA* **21**: 172–  
702 179.
- 703 Yang Y, Fan X, Mao M, Song X, Wu P, Zhang Y, Jin Y, Yang Y, Chen L-L, Wang Y, et al. 2017. Extensive  
704 translation of circular RNAs driven by N6-methyladenosine. *Cell Res* **27**: 626–641.  
705 <http://www.ncbi.nlm.nih.gov/pubmed/28281539> (Accessed August 31, 2017).
- 706 Zaphiropoulos PG. 1997. Exon skipping and circular RNA formation in transcripts of the human  
707 cytochrome P-450 2C18 gene in epidermis and of the rat androgen binding protein gene in  
708 testis. *Mol Cell Biol* **17**: 2985–2993.
- 709 Zhang X-O, Dong R, Zhang Y, Zhang J-L, Luo Z, Zhang J, Chen L-L, Yang L. 2016. Diverse alternative  
710 back-splicing and alternative splicing landscape of circular RNAs. *Genome Res* **26**: 1277–87.  
711 <http://genome.cshlp.org/lookup/doi/10.1101/gr.202895.115> (Accessed September 1, 2017).
- 712 Zhang XO, Wang H Bin, Zhang Y, Lu X, Chen LL, Yang L. 2014. Complementary sequence-mediated  
713 exon circularization. *Cell* **159**: 134–147.
- 714 Zheng Q, Bao C, Guo W, Li S, Chen J, Chen B, Luo Y, Lyu D, Li Y, Shi G, et al. 2016. Circular RNA

715 profiling reveals an abundant circHIPK3 that regulates cell growth by sponging multiple  
716 miRNAs. *Nat Commun* **7**: 11215.  
717 <http://www.nature.com/doi/10.1038/ncomms11215>  
718 <http://www.nature.com/ncomms/2016/160406/ncomms11215/full/ncomms11215.html>.

719

## Figure 1

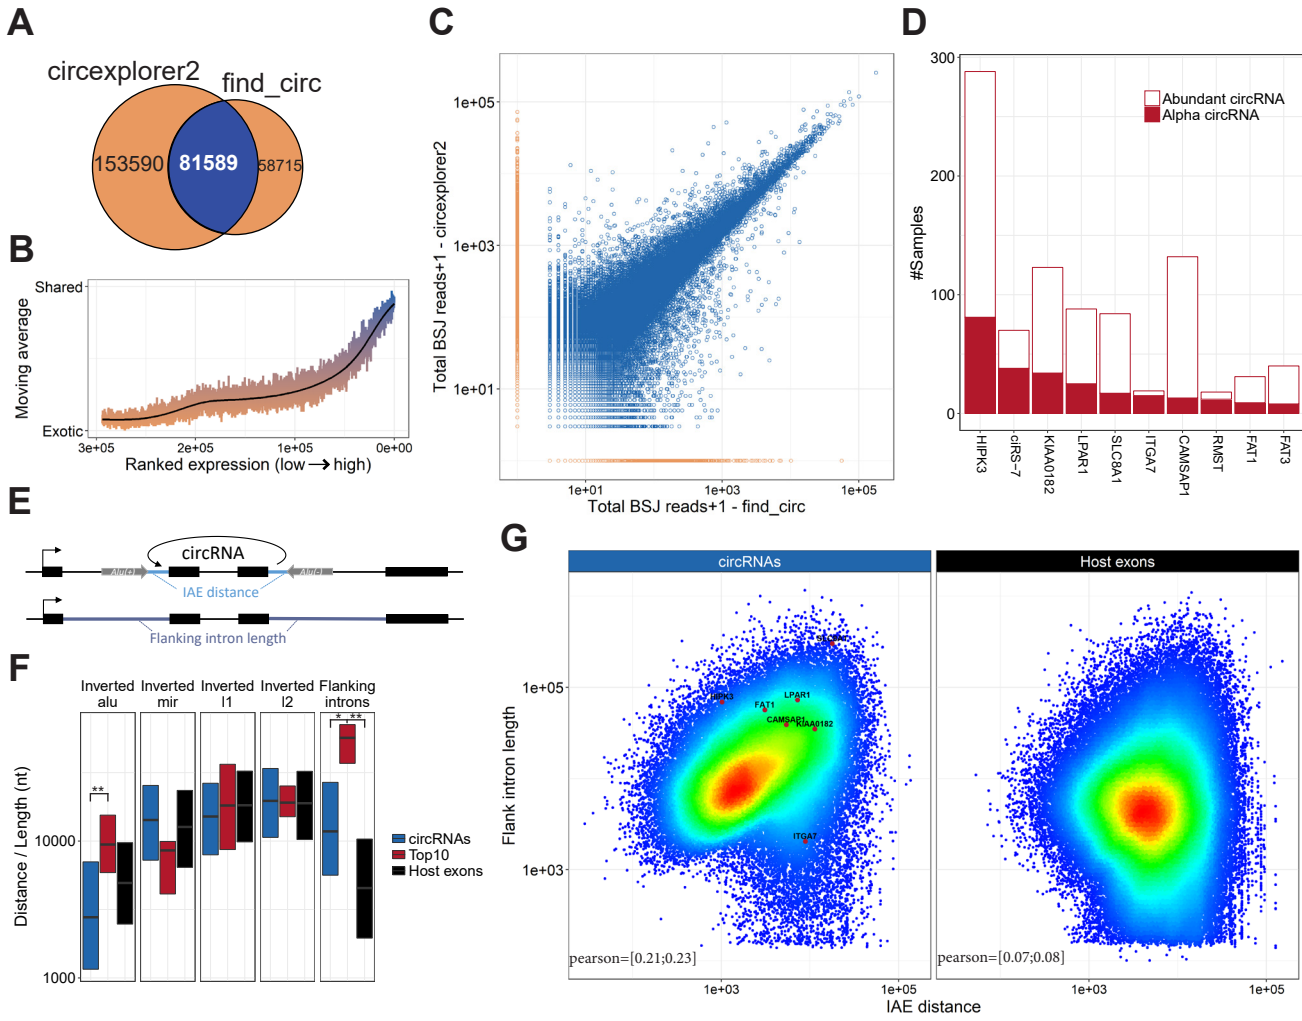

## Figure 2

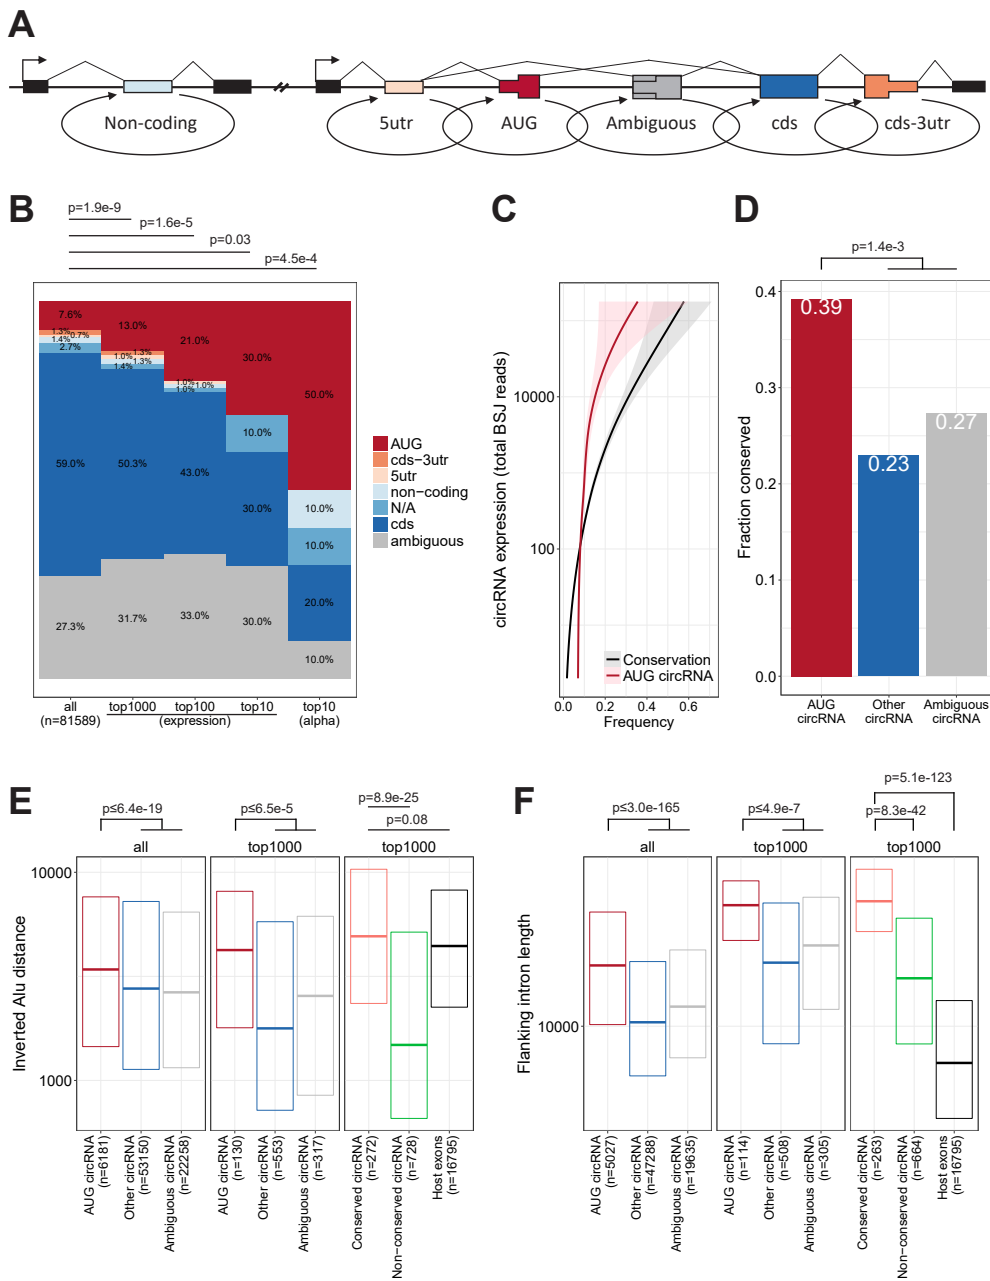



### Figure 3

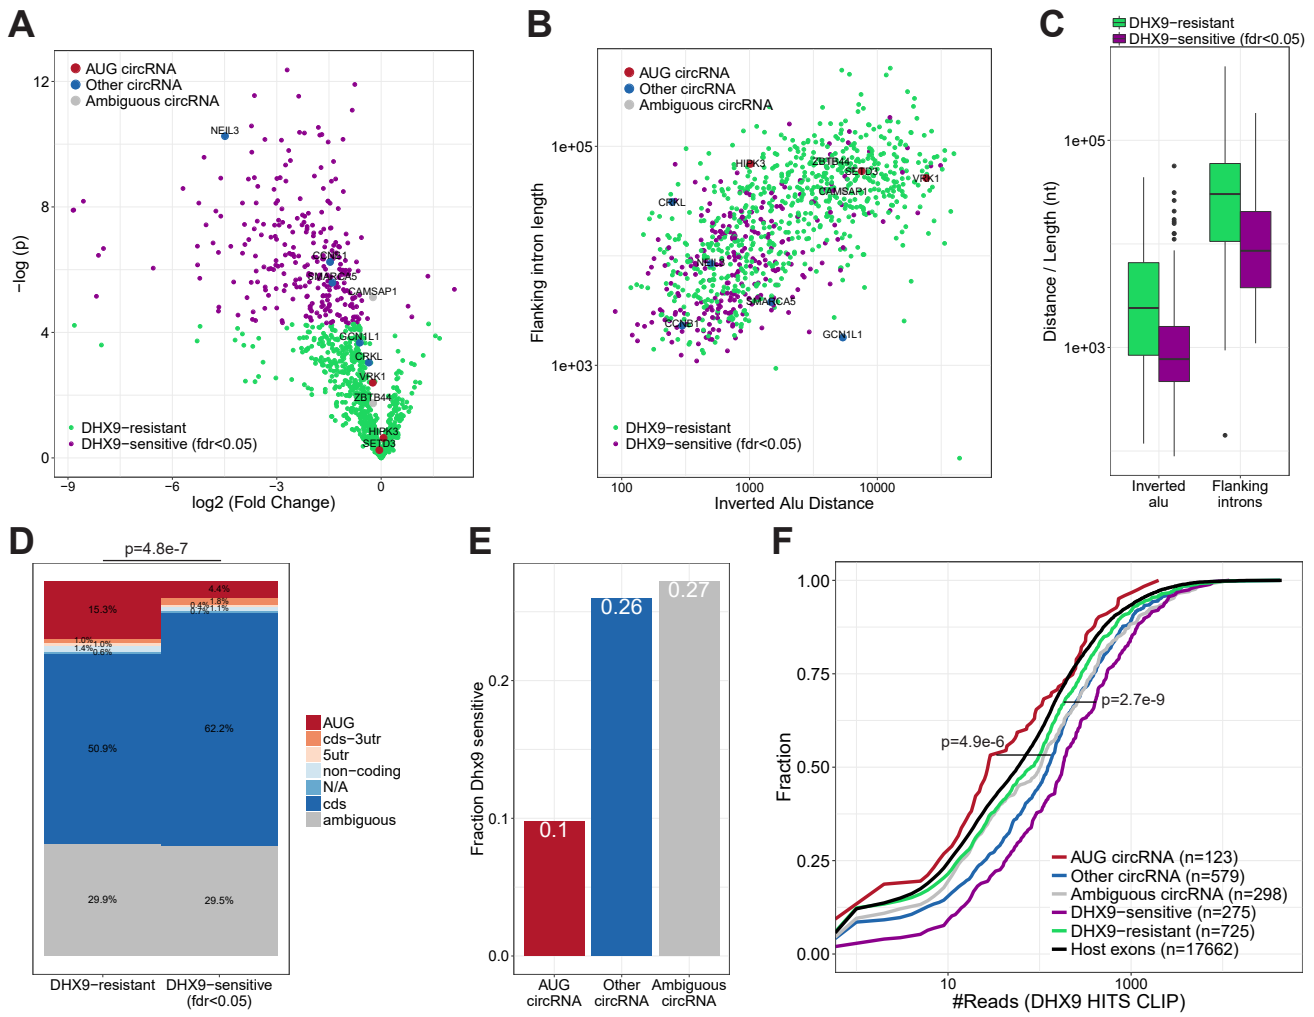

## Figure 4

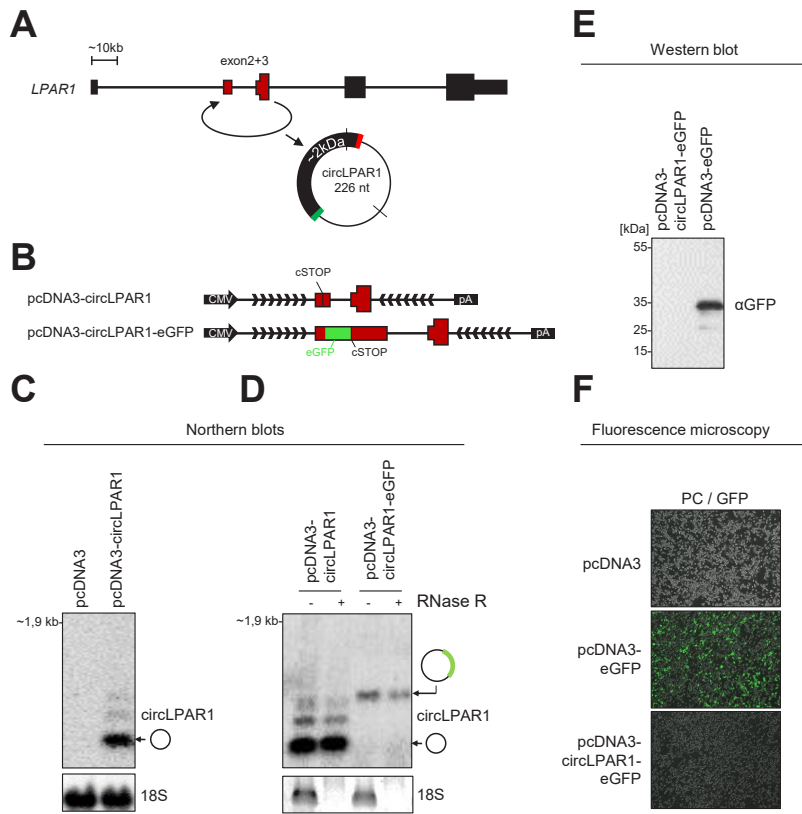

## Figure 5

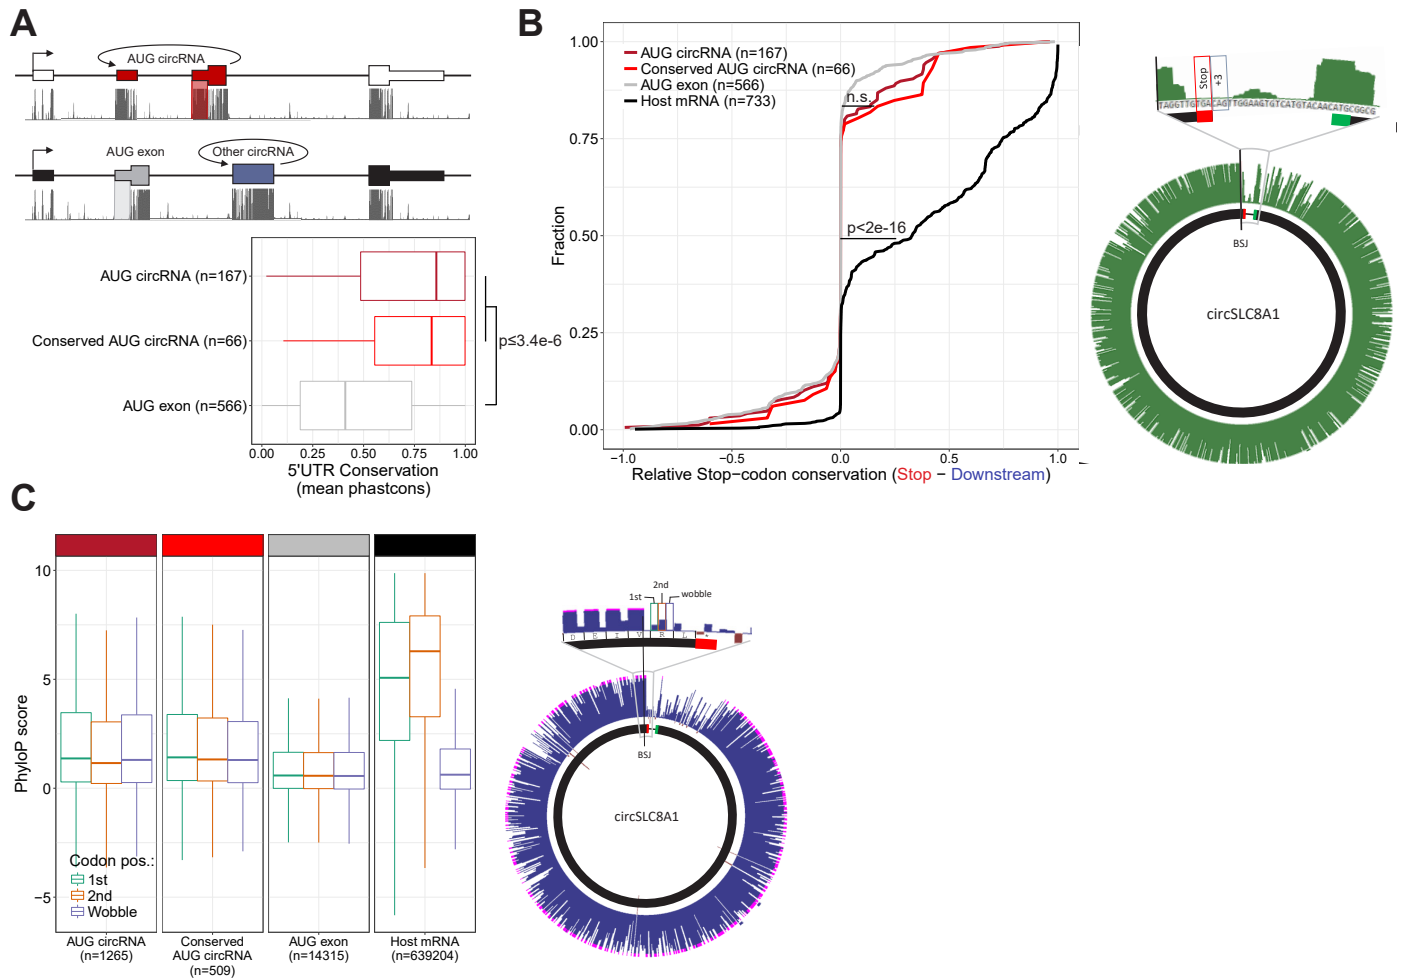

## Figure 6

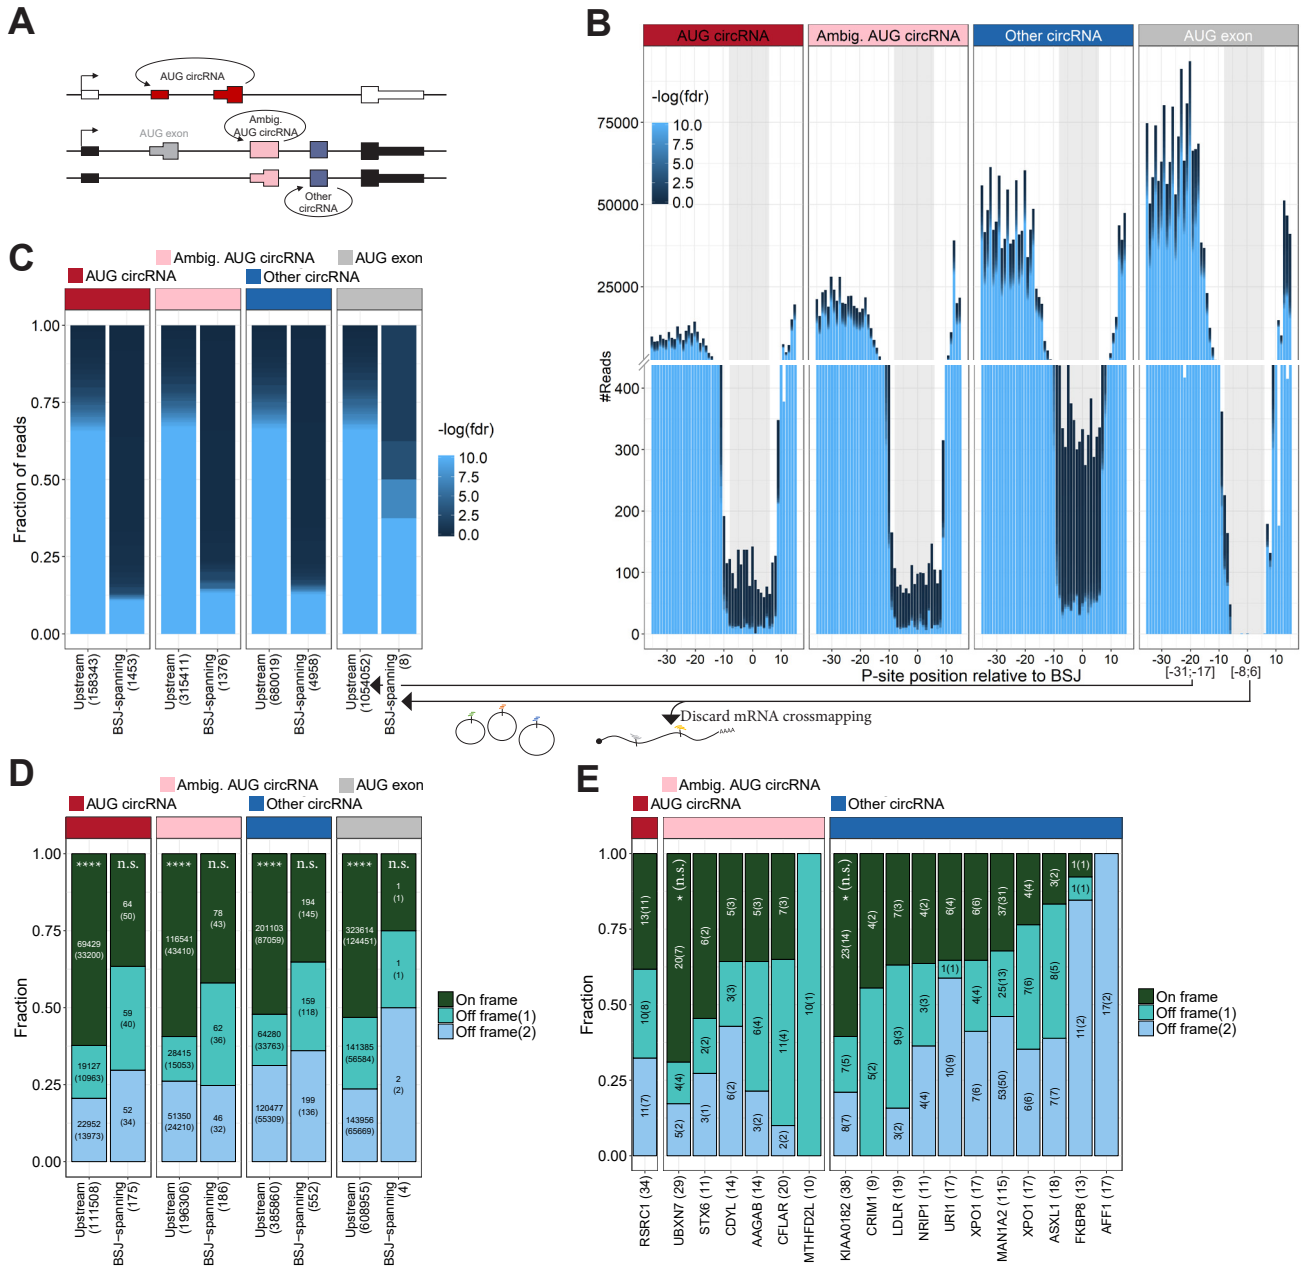

Source: http://biorxiv.org/content/10.1101/328104v1.full.pdf
